# Supplementary material for: Diel variability of methane emissions from lakes
Source: PubMed Central journal article supplement (PMC7474682; doi:10.1073/pnas.2006024117), 2020-08-17
Supplement: pnas.2006024117.sapp.pdf [file pnas.2006024117.sapp.pdf]

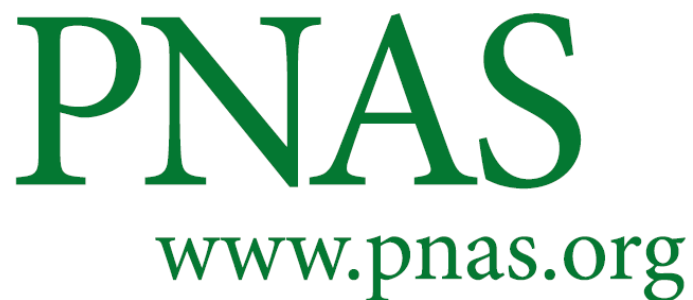

Supplementary Information for

Diel variability of methane emissions from lakes

Anna K. Sieczko, Nguyen T. Duc, Jonathan Schenk, Gustav Pajala, David Rudberg,  
Henrique O. Sawakuchi, David Bastviken

Anna Sieczko

Email: [anna.sieczko@liu.se](mailto:anna.sieczko@liu.se)

**This PDF file includes:**

Figures S1 to S6

Tables S1 to S2

SI References

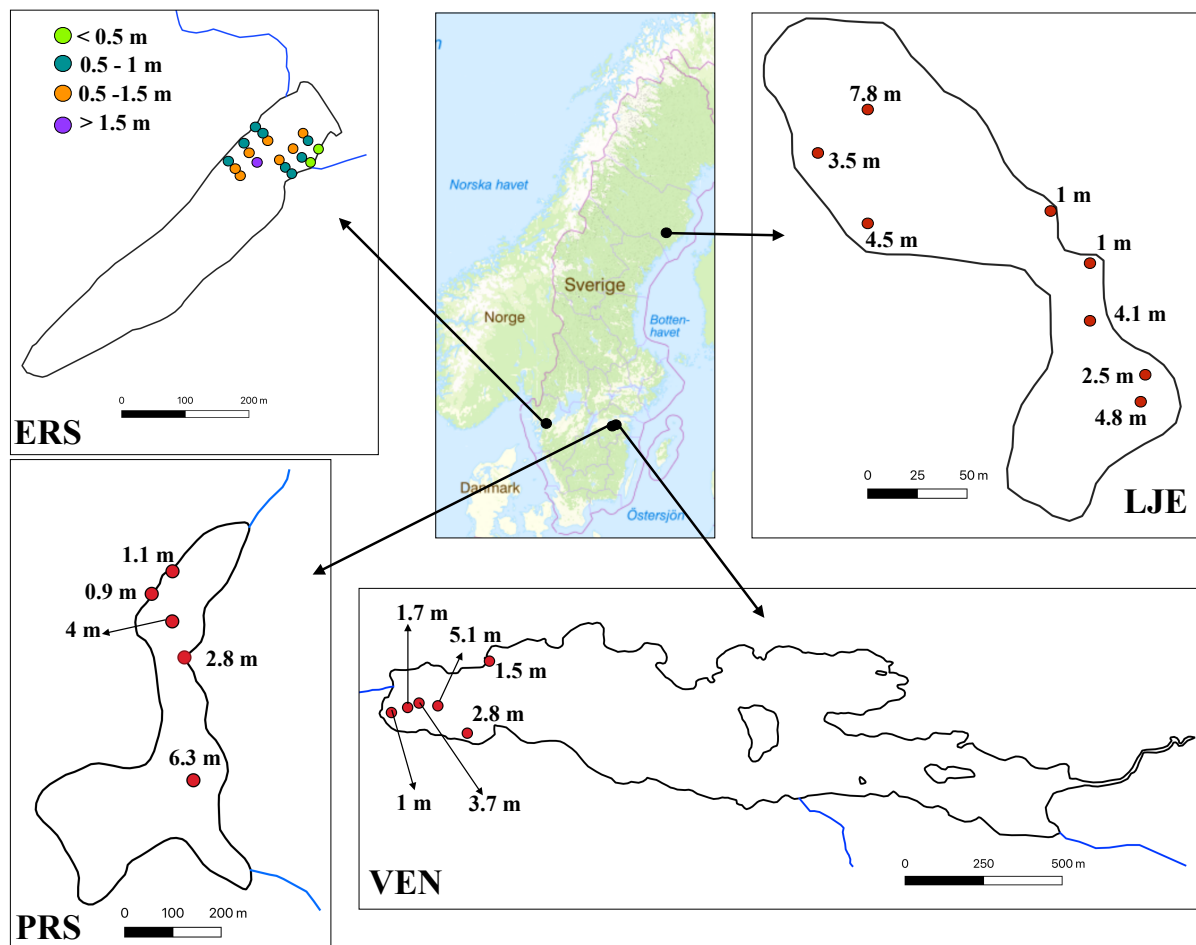

**Fig. S1.** Maps of the studied lakes: Ljusvattermtjärn (LJE), Erssjön (ERS), Parsen (PRS) and Venasjön (VEN). Red points indicate locations of the automated floating chambers. Nearby numbers indicate depth. Points at ERS indicate locations of the floating chambers which were grouped into depth categories. Colors indicate four different depth categories. Lantmäteriet. Geodataportalen, URL: <https://www.geodata.se/geodataportalen>, [retrieved between 2020-01-31 - 2020-02-25]

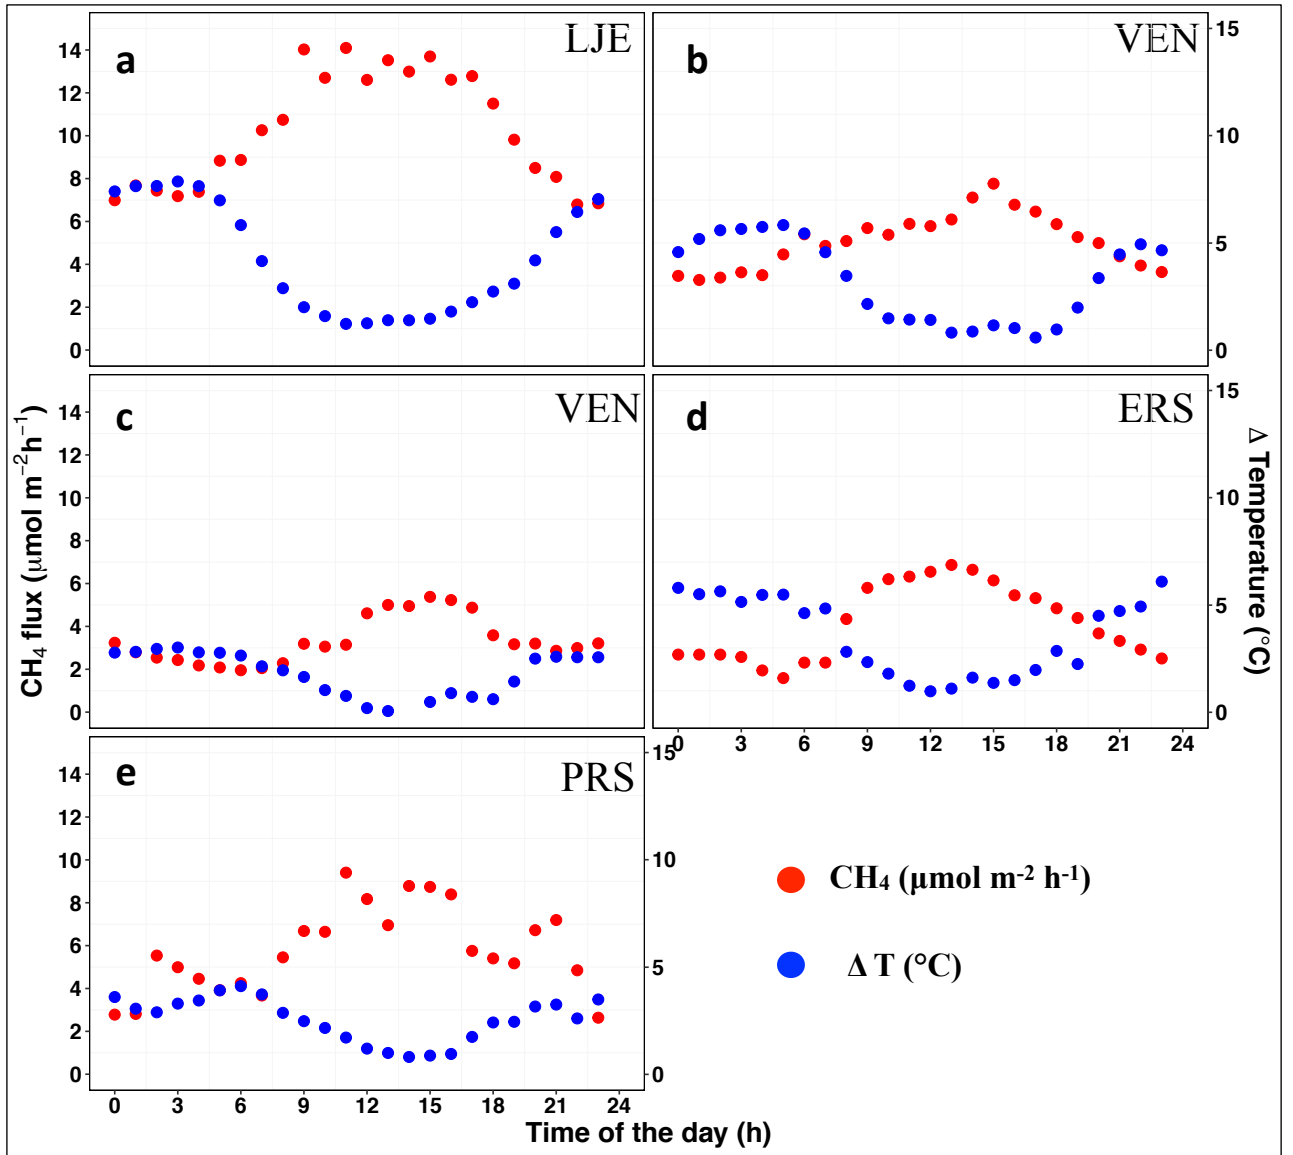

**Fig. S2.** Mean (geometric weighted average) of diel CH<sub>4</sub> flux patterns and the difference between water and air temperature in each lake during stratification (a, b) and mixing (c, d, e) periods. For abbreviations of lake names see Methods.

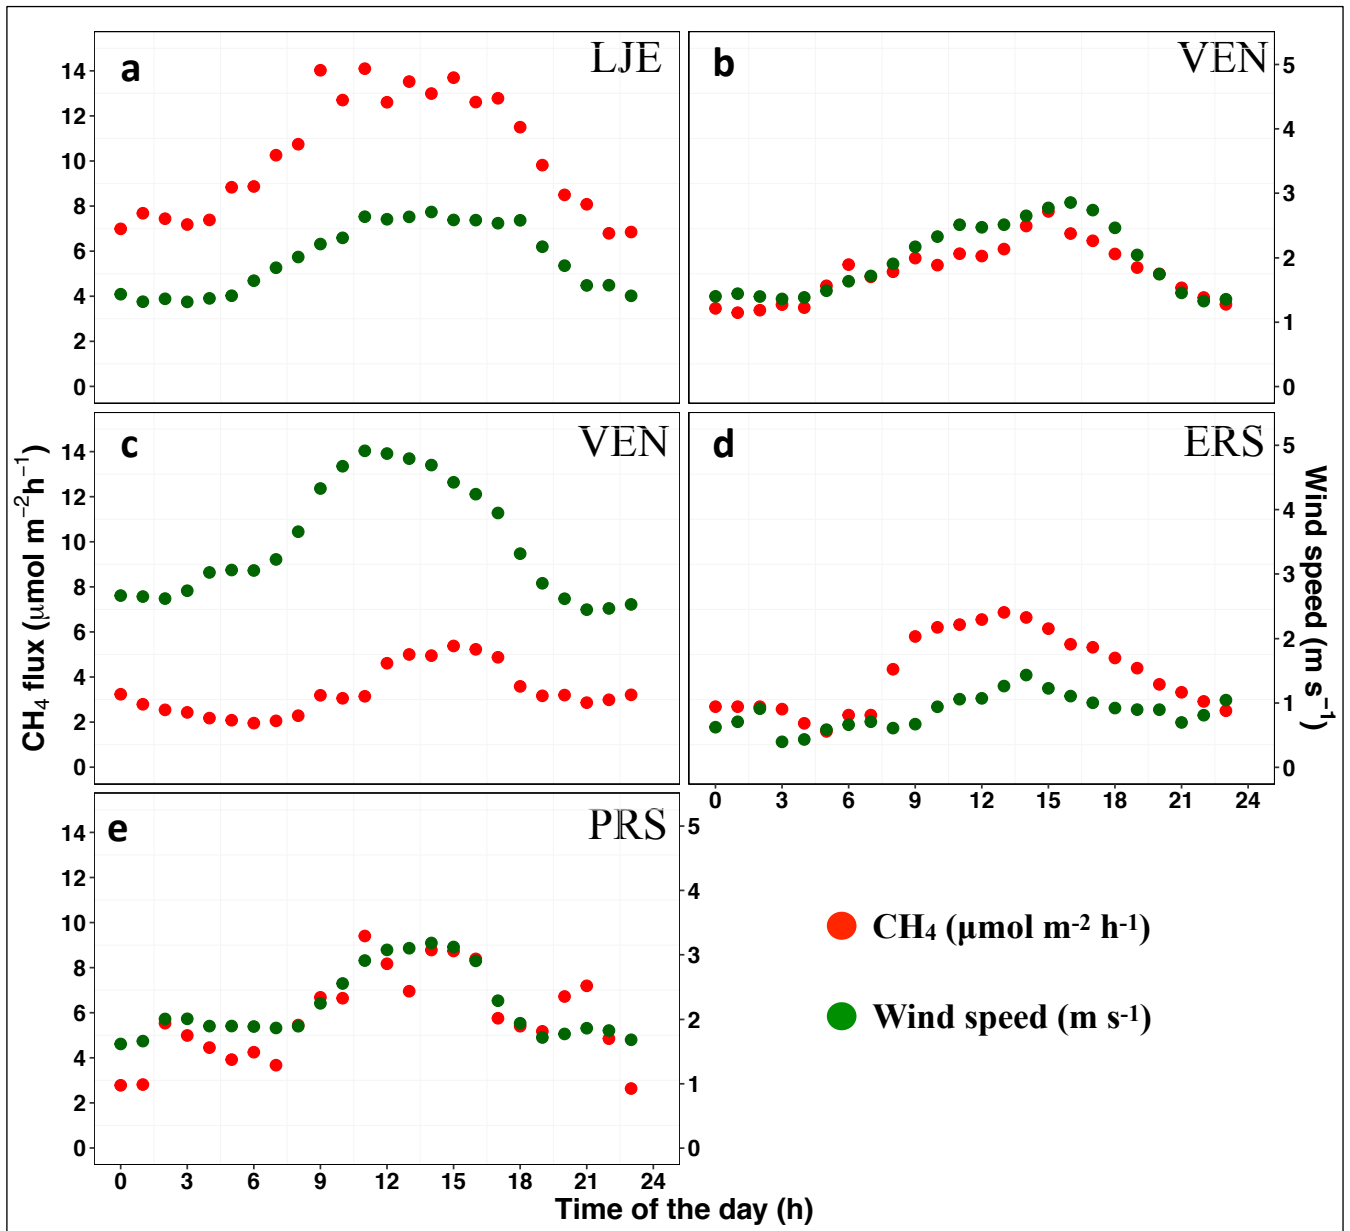

**Fig. S3.** Mean (geometric weighted average) of diel CH<sub>4</sub> flux patterns and wind speed in each lake during stratification (a, b) and mixing (c, d, e) periods. For abbreviations of lake names see Methods.

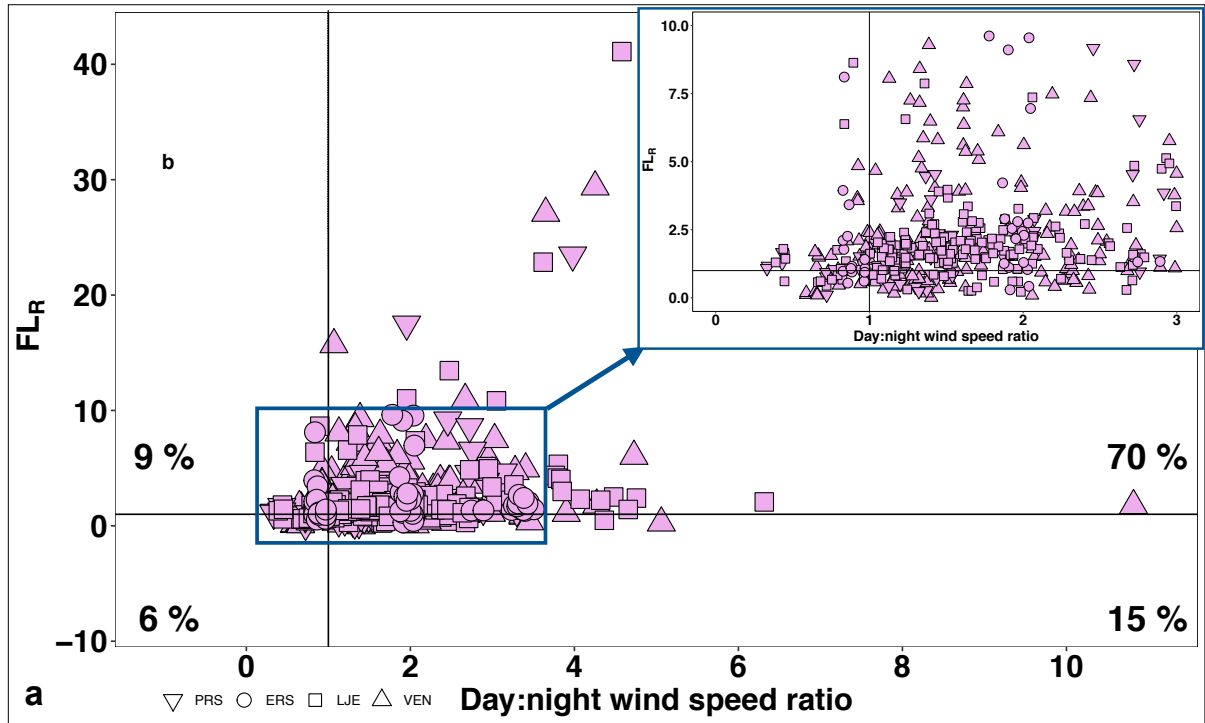

**Fig. S4.** CH<sub>4</sub> flux day:night ratio (FL<sub>R</sub>) in the lakes investigated in this study plotted against day:night wind speed ratio for each chamber and day-night cycle in each lake ( $n=524$ ). For abbreviations see Methods.

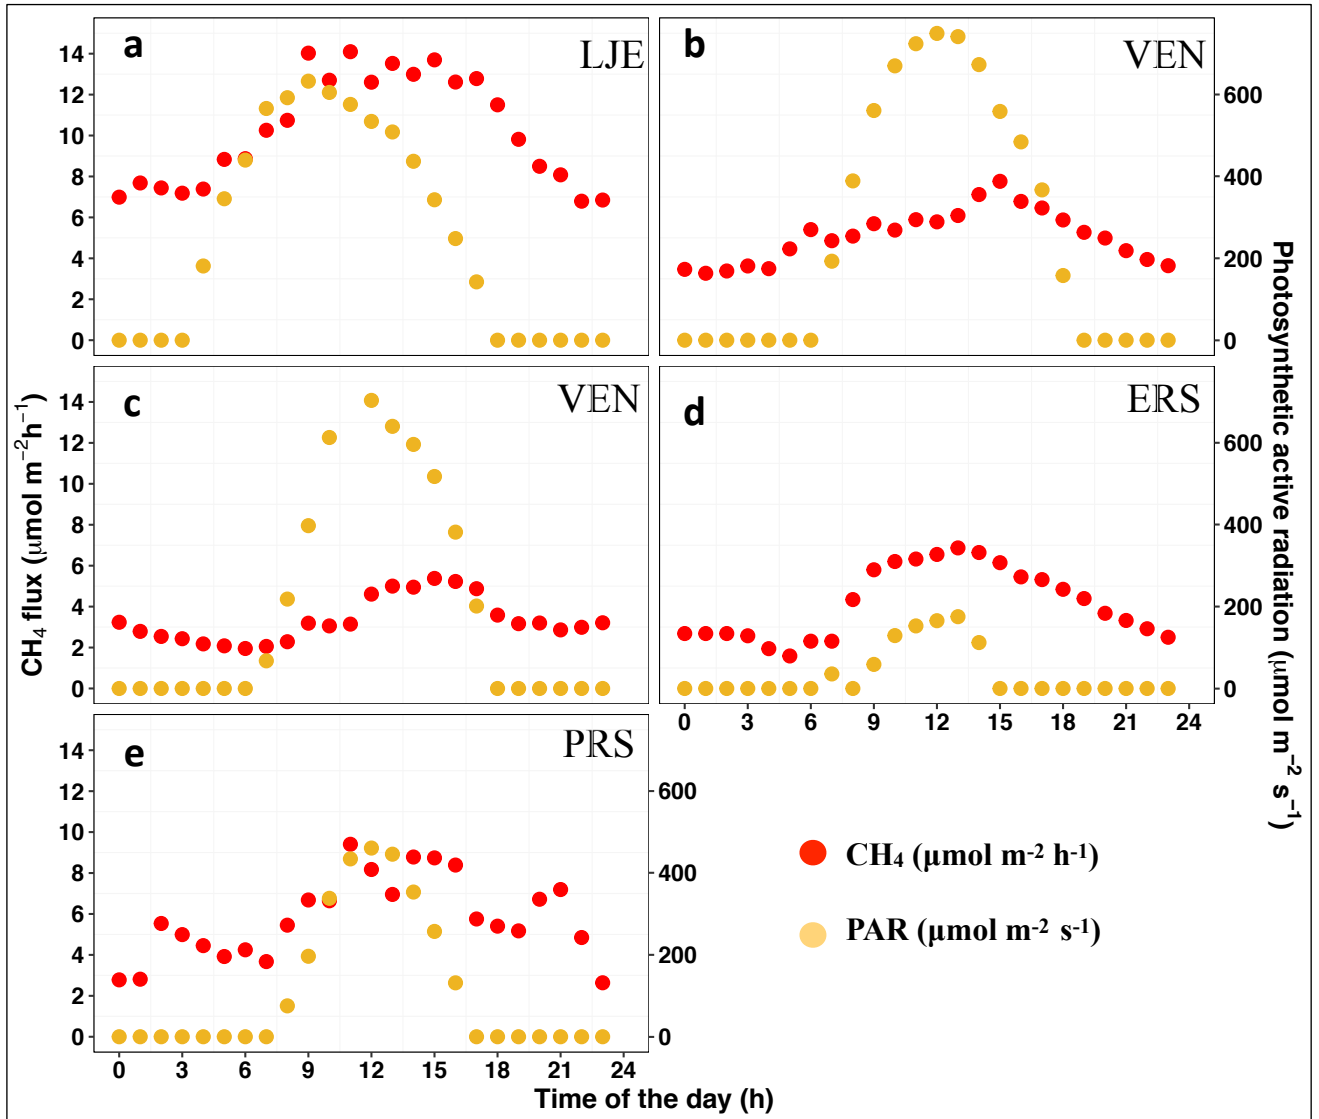

**Fig. S5.** Mean (geometric weighted average) of diel CH<sub>4</sub> flux pattern and photosynthetic active radiation in each lake during stratification (a, b) and mixing (c, d, e) periods. For abbreviation of lake names see Methods.

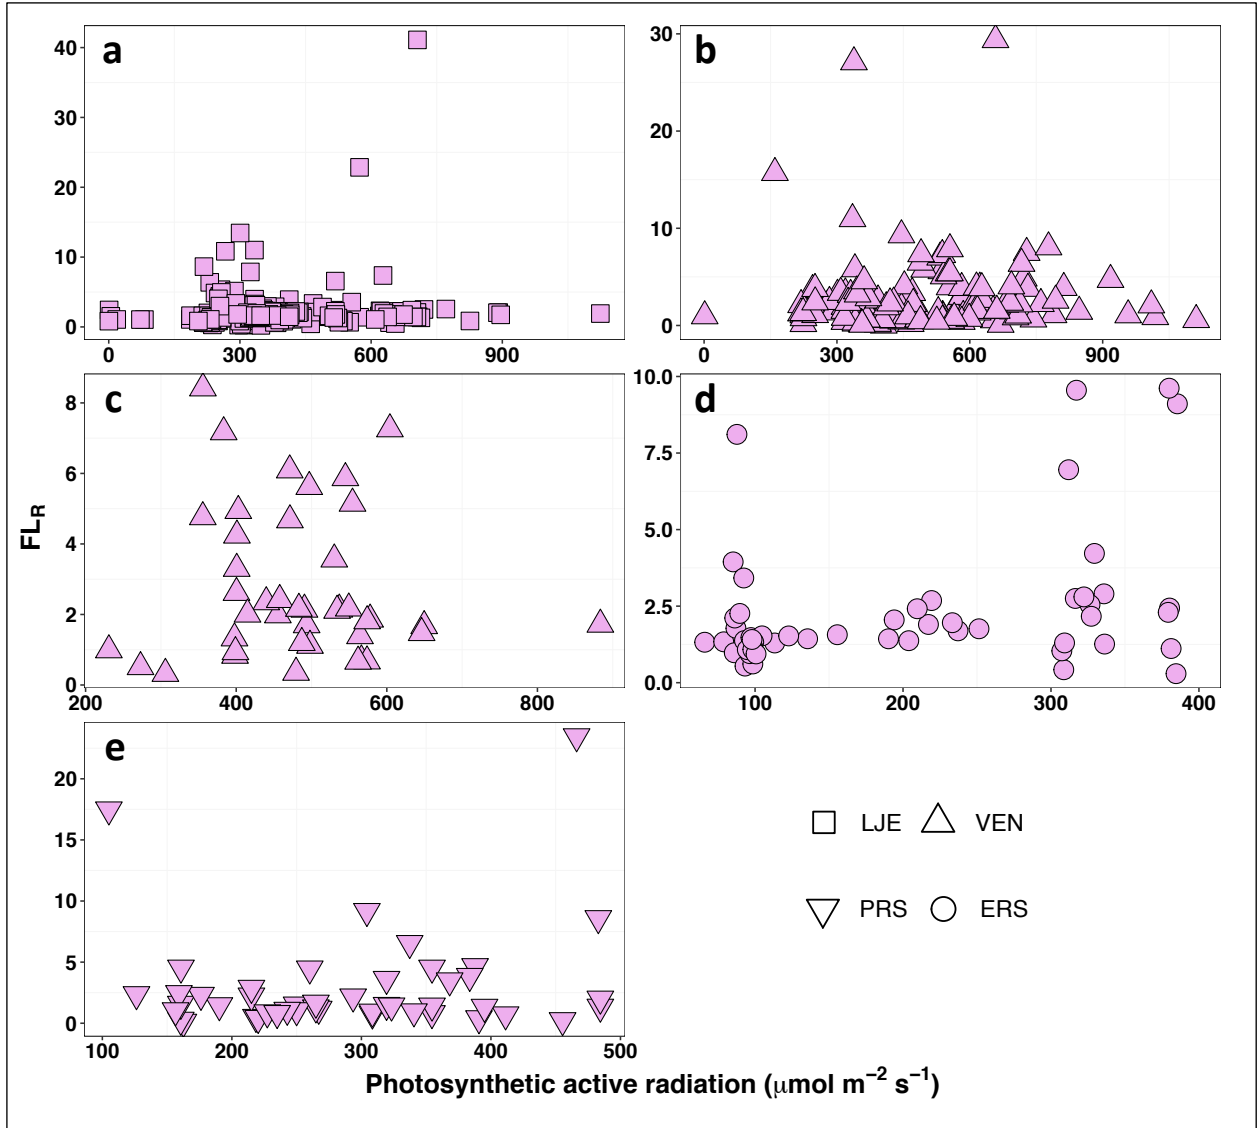

**Fig. S6.** CH<sub>4</sub> flux day:night ratio (FL<sub>R</sub>) in the lakes investigated in this study plotted against average daytime photosynthetic active radiation (PAR) for each chamber and in each lake during stratified (a, b) and mixing (c, d, e) periods ( $n=524$ ). For abbreviations of lake names see Methods.

**Table S1.** Main characteristics of the studied lakes with the mean and range (minimum-maximum) of selected parameters. For lake name abbreviations see Methods and Fig. S1. All the values are for the surface water (0.1 – 0.5 m). Total nitrogen (TN); total phosphorus (TP); dissolved organic carbon (DOC); chlorophyll a (chl a).

| Parameter                           | LJE                              | VEN                          | ERS                         | PRS                          |
|-------------------------------------|----------------------------------|------------------------------|-----------------------------|------------------------------|
| Coordinates                         | 64°05'34.0"N<br>18°55'43.0"E     | 58°27'22.0"N<br>16°10'31.0"E | 58°22'23" N,<br>12°89'55" E | 58°20'39.0"N<br>16°12'23.0"E |
| Water temperature (°C)              | 15.0 – 20.0<br>(18.0)            | 12.9- 20.7<br>(16.8)         | 2.0 – 17.7 (7.6)            | 6.6 – 12.4<br>(10.3)         |
| TN (mg l <sup>-1</sup> )            | 0.15 – 0.42<br>(0.25)            | 0.41 – 0.96<br>(0.78)        | 0.7 – 1.4 (1.1)*            | 0.59 – 0.6<br>(0.62)         |
| TP (µg l <sup>-1</sup> )            | 6.9 – 12.9<br>(9.9) <sup>†</sup> | 38.1 – 64.7<br>(48.7)        | 20.6 – 60.1<br>(35.0)*      | 16.6 – 17.5<br>(17.1)        |
| DOC (mg l <sup>-1</sup> )           | 6.3 - 22.9<br>(12.2)             | 13.4 – 18.5<br>(14.9)        | 15.8 – 27.7<br>(22.5)*      | 14.6 – 17.7<br>(15.7)        |
| pH                                  | 5.7-6.5 (6.2) <sup>†</sup>       | 7.3-8.1 (7.6)                | 3.9 - 6.8 (5.0)             | 6.4-7.1 (7.0)                |
| Conductivity (µS cm <sup>-1</sup> ) | 8-16 (12) <sup>†</sup>           | 161-188 (170)                | 65 – 261 (103)              | 72-92 (78)                   |
| Max depth (m)                       | 9.4                              | 11                           | 4.5                         | 6.7                          |
| Chl a (µg l <sup>-1</sup> )         | 1.1-1.6 (1.3)                    | 17.8-42.1<br>(29.8)          | 0.2-16.9 (4.6)              | 2.5-4.3 (3.4)                |

\* Data from Natchimuthu et al. 2016 (1); <sup>†</sup>average for May-July 2019.



**Table S2.** Examples of studies on diel variability of CH<sub>4</sub> fluxes in lakes, ponds and reservoirs

|                                                         | study                                       | Ecosystem type                                        | Method                  | Season            | Frequency of flux                                 | Duration of the study | Highest flux              | Mean day/night ratio |
|---------------------------------------------------------|---------------------------------------------|-------------------------------------------------------|-------------------------|-------------------|---------------------------------------------------|-----------------------|---------------------------|----------------------|
| F<br>L<br>U<br>X<br><br>C<br>H<br>A<br>M<br>B<br>E<br>R | Bastviken et al. (2004) (2)                 | Temperate <b>lakes</b>                                | Floating chambers       | summer            | 1 – 8 times a day                                 | 1 day                 | day                       | 1.7                  |
|                                                         | Bastviken et al. (2010) (3)                 | Tropical floodplain <b>lake</b>                       | Floating chambers       | low water         | 4 times a day (every 10th minutes for 40 minutes) | 1 day                 | Afternoon (15:00 – 16:00) | 2                    |
|                                                         | Liu et al. (2017) (4)                       | Subtropical lake                                      | Floating chambers       | wet               | 2 h                                               | 1 day                 | late morning (12:00)      | -11.3                |
|                                                         |                                             |                                                       |                         | wet               | 2 h                                               | 1 day                 | late morning (12:00)      | 8.7                  |
|                                                         |                                             |                                                       |                         | dry               | 2 h                                               | 1 day                 | Pre-dawn                  | 4.6                  |
|                                                         |                                             |                                                       |                         | dry               | 2 h                                               | 1 day                 | late morning (12:00)      | 7.6                  |
|                                                         |                                             |                                                       | Floating chambers       | autumn stratified | 2 – 3 times a day                                 | 11 days               | day                       | 2.2                  |
|                                                         | Erkkila et al. (2018) (5)                   | Boreal <b>lake</b>                                    | Floating chambers       | autumn stratified | 2 – 3 times a day                                 | 11 days               | day                       | 2.2                  |
|                                                         | Sieczko et al. (2020) ( <i>this study</i> ) | Boreal <b>lakes</b>                                   | Automated flux chambers | summer            | 0.5 – 3.1 h                                       | 43 days               | day                       | 2.3                  |
|                                                         |                                             |                                                       |                         |                   | 0.4 – 2.9 h                                       | 40 days               |                           | 2.7                  |
| autumn                                                  |                                             |                                                       |                         | 0.4 – 2.8 h       | 12 days                                           | 2.7                   |                           |                      |
|                                                         |                                             |                                                       |                         | 0.4 – 2.7 h       | 27 days                                           | 2.9                   |                           |                      |
| Floating chambers                                       |                                             |                                                       | autumn                  | 2.9 – 8.9 h       | 11 days                                           | 2.4                   |                           |                      |
| Xiao et al. (2013) (6)                                  | Subtropical hydropower <b>reservoir</b>     | Dynamic closed chamber (cavity ringdown spectroscopy) | wet and dry             | 0.5 h             | 3 days in total (1 day each month)                | no clear pattern      | not reported              |                      |

|                                                                        |                               |                         |                                                         |                                |                              |                        |         |              |
|------------------------------------------------------------------------|-------------------------------|-------------------------|---------------------------------------------------------|--------------------------------|------------------------------|------------------------|---------|--------------|
|                                                                        | Linkhorst (2019) (7)          | Tropical reservoir      | Floating chambers + bubble traps                        |                                | Every 1 h for 5 minutes (x3) | 1 day (48 h)           | day     | ~1.01        |
|                                                                        |                               | Tropical reservoir      |                                                         |                                | Every 1 h for 5 minutes (x3) | 1 day (48 h)           | day     | ~2.3         |
|                                                                        | Xiao et al. (2014) (8)        | Subtropical pond        | Static closed chamber<br>(cavity ringdown spectroscopy) | summer, autumn                 | 0.5 h                        | 3 days (2+1)           | night   | 0.81         |
|                                                                        | Bansal et al. (2018) (9)      | Wetland pond            | automatic chamber                                       | spring, summer, autumn         | 6 – 9 times a day            | 11 months over 2 years | day     | not reported |
| E<br>D<br>D<br>Y<br><br>C<br>O<br>V<br>A<br>R<br>I<br>A<br>N<br>C<br>E | Podgrajsek et al. (2014) (10) | Boreal lake             | Eddy covariance                                         | spring                         | 0.5 h                        | 4 days                 | night   | ~ 0.2        |
|                                                                        |                               |                         |                                                         | autumn                         | 0.5 h                        | 10 days                | night   | ~ 0.3        |
|                                                                        | Franz et al. (2016) (11)      | Temperate peatland lake | Eddy covariance                                         | spring, summer, autumn, winter | 0.5 h                        | 1 year                 | night   | not reported |
|                                                                        | Xiao et al. (2017) (12)       | subtropical lake        | flux gradient and the eddy covariance method            | spring, summer, autumn, winter | 0.5 h                        | 1.9 year               | night   | 0.95         |
|                                                                        | Jammet et al. (2017) (13)     | Subarctic peatland lake | eddy covariance                                         | summer                         | 24                           | 3 x 4.5 month          | morning | not reported |
|                                                                        | Erkkila et al. (2018) (5)     | Boreal lake             | eddy covariance                                         | autumn stratified              | 0.5 h                        | 11 days                | day     | 1.2          |
| autumn mixing                                                          |                               |                         |                                                         | 0.5 h                          | 5 days                       | day                    | 1.2     |              |

|                                                                              |                               |                             |                                        |                        |                  |           |         |     |
|------------------------------------------------------------------------------|-------------------------------|-----------------------------|----------------------------------------|------------------------|------------------|-----------|---------|-----|
|                                                                              | Sollberger et al. (2017) (14) | Alpine hydropower reservoir | eddy covariance                        | spring, summer, autumn | 0.5 h            | 8.7 month | day     | 3.2 |
| G<br>A<br>S<br>T<br>R<br>A<br>N<br>S<br>F<br>E<br>R<br>M<br>O<br>D<br>E<br>L | Ford et al. (2002) (15)       | Floodplain lake             | surface water concentration            | autumn                 | 4 times a day    | 3.5 days  | morning | 18  |
|                                                                              |                               |                             | surface water concentration            | summer                 | 6-10 times a day | 3.5 days  | morning | 2   |
|                                                                              | Erkkila et al. (2018) (5)     | Boreal lake                 | <i>k</i> model (Cole and Caraco 1998)  | autumn stratified      | 2 h              | 11 days   | night   | 0.7 |
|                                                                              |                               |                             |                                        | autumn mixing          | 2 h              | 5 days    | day     | 1.3 |
|                                                                              |                               |                             | <i>k</i> model (Tedford et al. 2014)   | autumn stratified      | 2 h              | 11 days   | night   | 0.8 |
|                                                                              |                               |                             |                                        | autumn mixing          | 2 h              | 5 days    | day     | 1.1 |
|                                                                              |                               |                             | <i>k</i> model (Heiskanen et al. 2014) | autumn stratified      | 2 h              | 11 days   | night   | 0.4 |
|                                                                              |                               |                             |                                        | autumn mixing          | 2 h              | 5 days    | day     | 1.1 |
|                                                                              |                               |                             | surface water concentration            | summer                 | 6-10 times a day | 3.5 days  | morning | 2   |

## SI References

1. S. Natchimuthu *et al.*, Spatio-temporal variability of lake CH<sub>4</sub> fluxes and its influence on annual whole lake emission estimates. *Limnol. Oceanog.* **61**, S13-S26 (2016).
2. D. Bastviken, J. Cole, M. Pace, L. Tranvik, Methane emissions from lakes: Dependence of lake characteristics, two regional assessments, and a global estimate. *Global Biogeochem. Cycles* **18** (2004).
3. D. Bastviken *et al.*, Methane emissions from Pantanal, South America, during the low water season: toward more comprehensive sampling. *Environ. Sci. Technol.* **44**, 5450-5455 (2010).
4. L. Liu, M. Xu, R. Li, R. Shao, Timescale dependence of environmental controls on methane efflux from Poyang Hu, China. *Biogeosciences* **14**, 2019-2032 (2017).
5. K.-M. Erkkila *et al.*, Methane and carbon dioxide fluxes over a lake: comparison between eddy covariance, floating chambers and boundary layer method. *Biogeosciences* **15**, 429-445 (2018).
6. S. Xiao, D. Liu, Y. Wang, Z. Yang, W. Chen, Temporal variation of methane flux from Xiangxi Bay of the Three Gorges Reservoir. *Sci.Rep.* **3**, 2500 (2013).
7. A. Linkhorst, Greenhouse gas emission from tropical reservoirs: Spatial and temporal dynamics. (2019).
8. S. Xiao *et al.*, Gas transfer velocities of methane and carbon dioxide in a subtropical shallow pond. *Tellus B* **66**, 23795 (2014).
9. S. Bansal, B. Tangen, R. Finocchiaro, Diurnal patterns of methane flux from a seasonal wetland: Mechanisms and methodology. *Wetlands* **38**, 933-943 (2018).
10. E. Podgrajsek, E. Sahlée, A. Rutgersson, Diurnal cycle of lake methane flux. *J. Geophys. Res. Biogeosci.* **119**, 236-248 (2014).
11. D. Franz, F. Koebsch, E. Larmanou, J. Augustin, T. Sachs, High net CO<sub>2</sub> and CH<sub>4</sub> release at a eutrophic shallow lake on a formerly drained fen. *Biogeosciences* **13**, 3051-3070 (2016).
12. Q. Xiao *et al.*, Spatial variations of methane emission in a large shallow eutrophic lake in subtropical climate. *J. Geophys. Res. Biogeosci.* **122**, 1597-1614 (2017).
13. M. Jammet *et al.*, Year-round CH<sub>4</sub> and CO<sub>2</sub> flux dynamics in two contrasting freshwater ecosystems of the subarctic. *Biogeosciences* **14**, 5189-5216 (2017).
14. S. Sollberger, B. Wehrli, C. J. Schubert, T. DelSontro, W. Eugster, Minor methane emissions from an Alpine hydropower reservoir based on monitoring of diel and seasonal variability. *Environ. Sci. Process. Impacts* **19**, 1278-1291 (2017).
15. P. W. Ford, P. I. Boon, K. Lee, Methane and oxygen dynamics in a shallow floodplain lake: the significance of periodic stratification. *Hydrobiologia* **485**, 97-110 (2002).
